# Supplementary material for: Optogenetic mutagenesis in Caenorhabditis elegans
Source: PubMed Central journal article supplement (PMC4686824; doi:10.1038/ncomms9868), 2015-12-03
Supplement: ncomms9868-s1.pdf [file ncomms9868-s1.pdf]

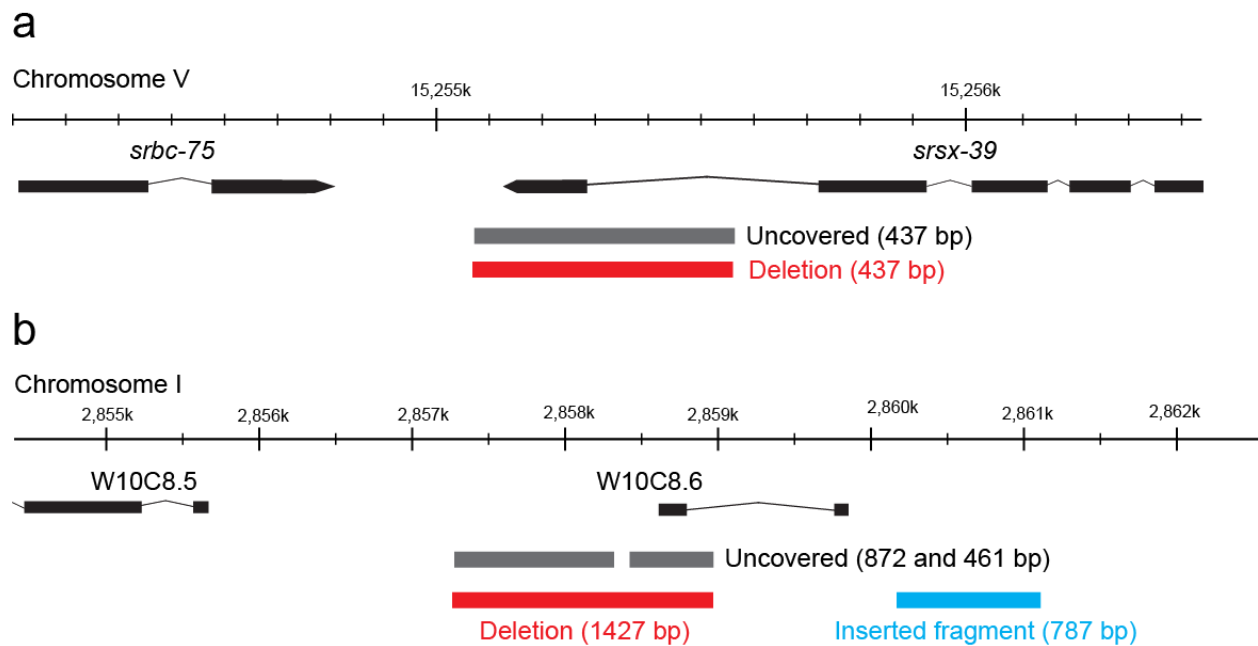

### Supplementary Fig. 1 Verification of optogenetically induced deletions

Genomic locations of uncovered regions revealed by WGS analysis of optogenetically induced *rpm-1(lf); syd-2(lf)* suppressors. Molecular lesions were confirmed by PCR and Sanger sequencing. (a) A 437-bp uncovered region (gray bar) in CZ22336 *dlk-1(ju1290); juSi163 ed3; juIs1; rpm-1(lf); syd-2(lf)*, which was confirmed by PCR and Sanger sequencing to be a 437-bp deletion (red bar). (b) Two adjacent uncovered regions (gray bars) in CZ22334 *juSi163 ed3; pmk-3(ju1291); juIs1; rpm-1(lf); syd-2(lf)*, which was confirmed by PCR and Sanger sequencing to be a 1427-bp deletion (red bar) with a 787-bp insertion from neighboring region to the deleted region (light blue bar).

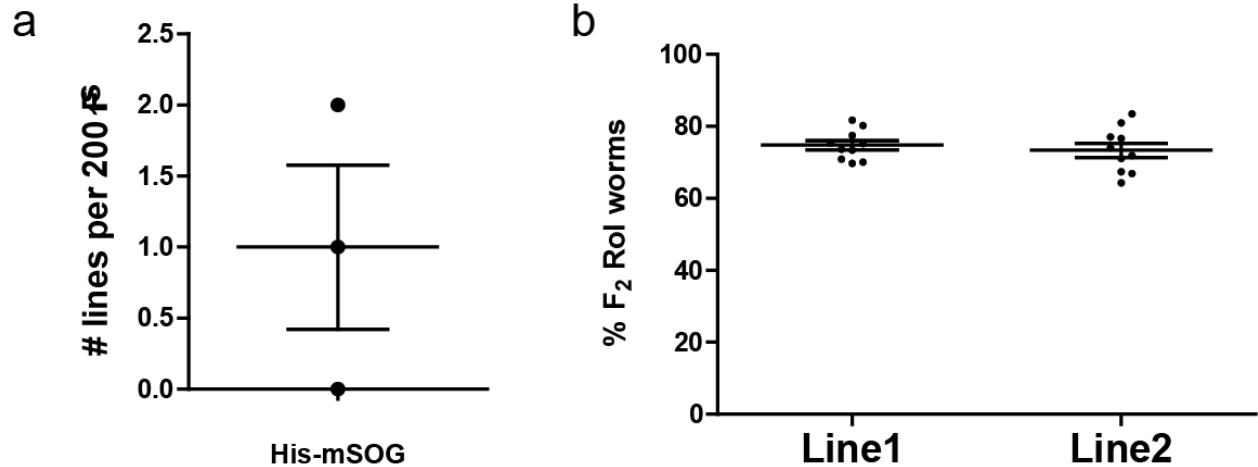

**Supplementary Fig. 2 His-mSOG mutagenesis can induce integration of multi-copy transgenes**

Parental worms expressing His-mSOG in the germline as well as multi-copy transgenes are treated with blue light. (a) Number of lines obtained from 200 F<sub>1</sub> worms. n= 3 independent experiments. (b) Ratio of roller worms among F<sub>2</sub> worms. Since *rol-6(su1006)* is a dominant roller phenotype, 75% of roller F<sub>2</sub> worms indicate a Mendelian segregation. Ten F<sub>1</sub> worms were examined for two independently isolated lines. Error bars indicate S.E.M. for the both panels.

## Supplementary Table 1 Strain list

| Strain  | Genotype                                                                              |
|---------|---------------------------------------------------------------------------------------|
| CZ20310 | <i>juSi164[Pmex-5-HIS-72::miniSOG::3'UTR(tbb-2) + Cb-unc-119(+)*] unc-119(ed3)III</i> |
| CZ20372 | <i>dpy-1(ju1157) juSi164 unc-119(ed3)III</i>                                          |
| CZ20373 | <i>unc-122(ju1158)I; juSi164 unc-119(ed3)III</i>                                      |
| CZ1338  | <i>juIs1[Punc-25-SNB-1::GFP]IV; rpm-1(ju44)V; syd-2(ju37)X</i>                        |
| CZ20638 | <i>juSi164 unc-119(ed3)III; juIs1IV; rpm-1(ju44)V; syd-2(ju37)X</i>                   |
| CZ20843 | <i>dlk-1(ju1202)I; juSi164 unc-119(ed3)III; juIs1IV; rpm-1(ju44)V; syd-2(ju37)X</i>   |
| CZ20844 | <i>dlk-1(ju1203)I; juSi164 unc-119(ed3)III; juIs1IV; rpm-1(ju44)V; syd-2(ju37)X</i>   |
| CZ21092 | <i>juSi164 unc-119(ed3)III; pmk-3(ju1207) juIs1IV; rpm-1(ju44)V; syd-2(ju37)X</i>     |
| CZ21093 | <i>juSi164 unc-119(ed3)III; pmk-3(ju1208) juIs1IV; rpm-1(ju44)V; syd-2(ju37)X</i>     |
| CZ21094 | <i>dlk-1(ju1209)I; juSi164 unc-119(ed3)III; juIs1IV; rpm-1(ju44)V; syd-2(ju37)X</i>   |
| CZ21095 | <i>dlk-1(ju1210)I; juSi164 unc-119(ed3)III; juIs1IV; rpm-1(ju44)V; syd-2(ju37)X</i>   |
| CZ21096 | <i>dlk-1(ju1211)I; juSi164 unc-119(ed3)III; juIs1IV; rpm-1(ju44)V; syd-2(ju37)X</i>   |
| CZ21097 | <i>juSi164 unc-119(ed3)III; juIs1IV; rpm-1(ju44)V; mkk-4(ju1212) syd-2(ju37)X</i>     |
| CZ21098 | <i>juSi164 unc-119(ed3)III; pmk-3(ju1213) juIs1IV; rpm-1(ju44)V; syd-2(ju37)X</i>     |
| CZ21099 | <i>juSi164 unc-119(ed3)III; juIs1IV; rpm-1(ju44)V; cebp-1(ju1214) syd-2(ju37)X</i>    |
| CZ21100 | <i>juSi164 unc-119(ed3)III; pmk-3(ju1215) juIs1IV; rpm-1(ju44)V; syd-2(ju37)X</i>     |
| CZ21101 | <i>juSi164 unc-119(ed3)III; mak-2(ju1216) juIs1IV; rpm-1(ju44)V; syd-2(ju37)X</i>     |
| CZ21102 | <i>dlk-1(ju1217)I; juSi164 unc-119(ed3)III; juIs1IV; rpm-1(ju44)V; syd-2(ju37)X</i>   |
| CZ21103 | <i>dlk-1(ju1218)I; juSi164 unc-119(ed3)III; juIs1IV; rpm-1(ju44)V; syd-2(ju37)X</i>   |
| CZ21104 | <i>juSi164 unc-119(ed3)III; mak-2(ju1219) juIs1IV; rpm-1(ju44)V; syd-2(ju37)X</i>     |
| CZ21105 | <i>dlk-1(ju1220)I; juSi164 unc-119(ed3)III; juIs1IV; rpm-1(ju44)V; syd-2(ju37)X</i>   |
| CZ21106 | <i>juSi164 unc-119(ed3)III; juIs1IV; rpm-1(ju44)V; mkk-4(ju1221) syd-2(ju37)X</i>     |
| CZ21107 | <i>juSi164 unc-119(ed3)III; pmk-3(ju1222) juIs1IV; rpm-1(ju44)V; syd-2(ju37)X</i>     |
| CZ22336 | <i>dlk-1(ju1290)I; juSi164 unc-119(ed3)III; juIs1IV; rpm-1(ju44)V; syd-2(ju37)X</i>   |
| CZ22337 | <i>dlk-1(ju1291)I; juSi164 unc-119(ed3)III; juIs1IV; rpm-1(ju44)V; syd-2(ju37)X</i>   |
| CZ22338 | <i>juSi164 unc-119(ed3)III; pmk-3(ju1292) juIs1IV; rpm-1(ju44)V; syd-2(ju37)X</i>     |
| CZ22318 | <i>juSi164 unc-119(ed3)III; juEx6771[rol-6(su1006)]</i>                               |

\**juSi164* also contains Neo(+) and *unc-119(+)* derived from MosSCI insertion.
